# Supplementary material
Source: PubMed Central journal article supplement (PMC1502465)

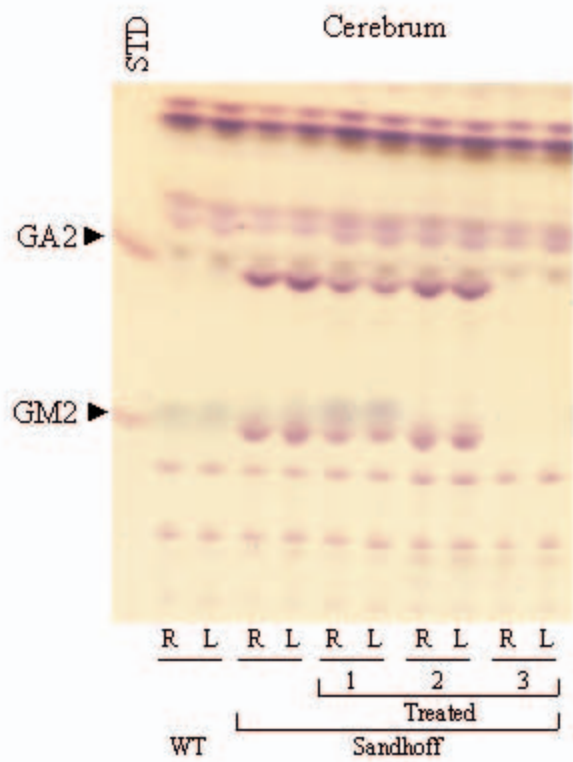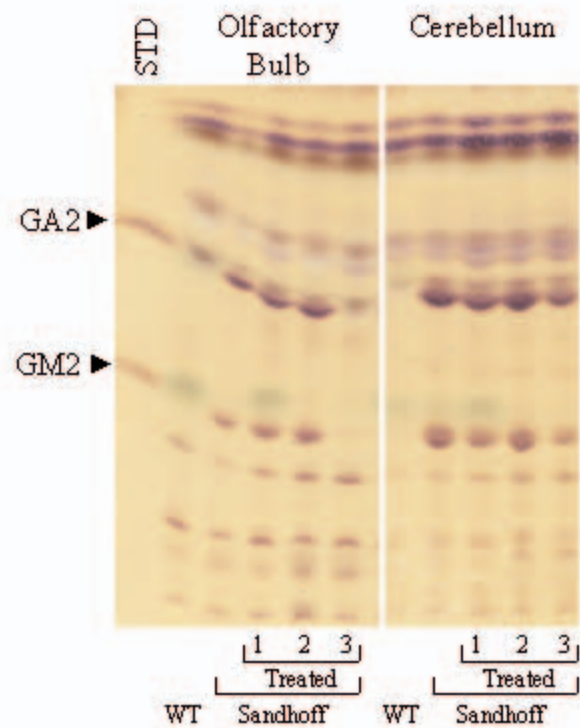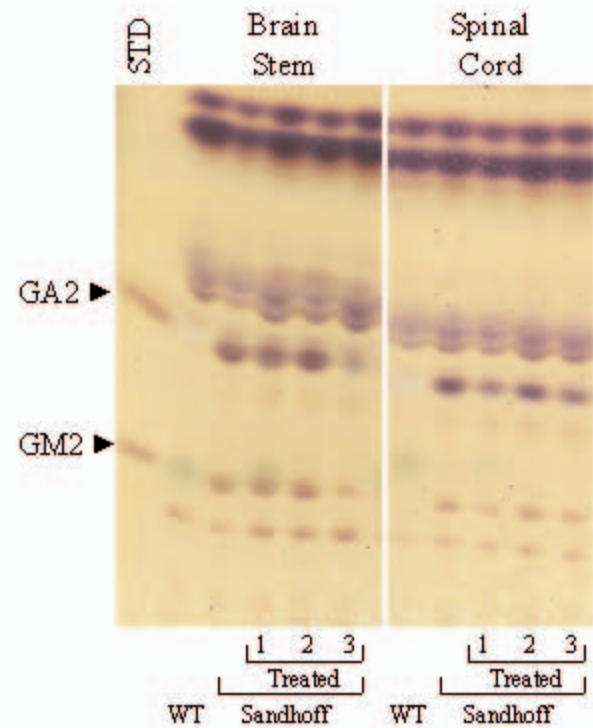

Supplement: pnas_0603765103_1.pdf [file pnas_0603765103_1.pdf]
